# Supplementary material
Source: PubMed Central journal article supplement (PMC6775976)
Supplement: 41396_2019_432_MOESM1_ESM.pdf [file 41396_2019_432_MOESM1_ESM.pdf]

1 Supplementary Information for

2  
3 Culturing the ubiquitous freshwater actinobacterial acI lineage by supplying a  
4 biochemical ‘helper’ catalase

5  
6 Suhyun Kim\*, Inam Kang\*, Ji-Hui Seo, and Jang-Cheon Cho

7  
8 Department of Biological Sciences, Inha University, Incheon 22212, Republic of Korea

9 \*These authors contributed equally to this work.

10  
11 (Running title: Culturing the acI lineage by catalase addition)

12  
13 Corresponding author: Jang-Cheon Cho

14 Email: chojc@inha.ac.kr

15  
16 This file includes:

17 Supplementary Information Text

18 Supplementary Materials and Methods

19 Supplementary Figure 1. Maximum-likelihood tree based on 16S rRNA gene sequences showing the  
20 phylogenetic position of strains IMCC25003 and IMCC26103.

21 Supplementary Figure 2. Revival and transfer cultures of strains IMCC25003 and IMCC26103.

22 Supplementary Figure 3. Growth curves of strains IMCC25003 and IMCC26103 obtained from the revival  
23 experiment of frozen glycerol stocks using the culture medium supplemented with catalase.

24 Supplementary Figure 4. Genome sequencing using the genomic DNA extracted from cultured and harvested  
25 cell pellets of the acI strains.

26 Supplementary Figure 5. Growth of strains IMCC25003 and IMCC26103 in culture media supplemented with  
27 catalase, autoclaved catalase, or ferric chloride.

28 Supplementary Figure 6. The effect of pyruvate concentration on the growth of acI strains and H<sub>2</sub>O<sub>2</sub>  
29 concentration of media during cultivation.

30 Supplementary Figure 7. The effect of catalase plus various concentrations of pyruvate on the growth of acI  
31 strains and H<sub>2</sub>O<sub>2</sub> concentration of media during cultivation.

32 Supplementary Figure 8. H<sub>2</sub>O<sub>2</sub> concentration of water samples collected monthly from the surface of Lake  
33 Soyang and the change in H<sub>2</sub>O<sub>2</sub> concentration during preparation of the basal culture medium  
34 FAMV+CM+AA.

35 Supplementary Figure 9. Increase in IMCC25003 *katG* expression with increasing concentration of H<sub>2</sub>O<sub>2</sub>.

36 Supplementary Figure 10. Expression, purification, and determination of native molecular weight of recombinant  
37 IMCC25003 KatG.

38 Supplementary Figure 11. Catalase and peroxidase activities of purified IMCC25003 KatG and bovine catalase  
39 (KatE).

40 Supplementary Figure 12. Kinetic curves of H<sub>2</sub>O<sub>2</sub> decomposition by IMCC25003 KatG and bovine catalase.

41 Supplementary Figure 13. Growth curves of strain IMCC25003 and strain IMCC26103 at different temperatures.

42 Supplementary Table 1. Media used in this study and their composition.

43 Supplementary Table 2. Trials to establish pure culture of strain IMCC25003.

44 Supplementary Table 3. Kinetic parameters of various catalase-peroxidases and bovine catalase.

45 Supplementary Table 4. List of acI genomes used in this study and the presence or absence of *katG* gene.

46 Supplementary Table 5. Fatty acids composition (%) of two acI strains.

47 Supplementary References

48

## 49 **Supplementary Information Text**

### 50 **Description of two proposed '*Candidatus*' species**

51 The average nucleotide identity value calculated from genome sequences between strain IMCC25003 and  
52 '*Ca. Planktophila sulfonica*' MMS-IA-56 was 84% and between strains MCC26103 and '*Ca. Planktophila lacus*'  
53 MMS-21-148 was 78%, which were both below the 95–96% cut-off value for bacterial species demarcation [1,  
54 2]. Analysis of genomic DNA-DNA relatedness and differential phenotypic characteristics indicated that strains  
55 IMCC25003 and IMCC26103 each represent novel species of the genus '*Candidatus Planktophila*'. However,  
56 because the two strains did not grow on a defined medium or a synthetic medium but replicated only in complex  
57 natural lake water media, limiting the deposition of the acI strains in culture collections, we propose the  
58 provisional names '*Candidatus Planktophila rubra*' for strain IMCC25003 and '*Candidatus Planktophila aquatilis*'  
59 for strain IMCC26103.

60

61 '***Candidatus Planktophila rubra***' (ru'bra. L. fem. adj. *rubra* reddish, pertaining to the reddish color of cells)

62 Represented by a cultured bacterial strain, IMCC25003. Gram-positive, aerobic, red-pigmented, non-  
63 motile, and chemoheterotrophic. Cells are curved rods with biovolume of 0.041  $\mu\text{m}^3$ , 0.46–1.23  $\mu\text{m}$  (average  
64 0.68  $\mu\text{m}$ ) long and 0.25–0.37  $\mu\text{m}$  (average 0.30  $\mu\text{m}$ ) wide. Grows in FAMV+CM+AA supplemented with >0.5 U  
65  $\text{mL}^{-1}$  catalase but does not grow in any liquid medium devoid of catalase and on any solid agar medium. Growth  
66 occurs at 10–30°C (optimum, 25°C). No single carbon sources enhance cellular growth. Requires sulfur-  
67 containing amino acids (methionine and cysteine) but prefers methionine. The major fatty acids (>10%) are  
68 summed feature 3 ( $\text{C}_{16:1} \omega 7c$  and/or  $\text{C}_{16:1} \omega 7c$ , 45.8%),  $\text{C}_{16:0}$  (23.1%), and  $\text{C}_{14:0}$  (18.2%). Strain IMCC25003 has  
69 a genome size of 1.354 Mbp with DNA G+C content of 49.1%. The complete genome sequence of strain  
70 IMCC25003 is available in GenBank (CP029557). Phylogenetically belongs to the acI-A1 tribe.

71 The representative strain IMCC25003 was isolated from a freshwater lake, Lake Soyang, Republic of  
72 Korea, using a dilution-to-extinction culturing.

73

74 '***Candidatus Planktophila aquatilis***' (a.qua.ti'lis. L. fem. adj. *aquatilis* living, growing, or found, in or near  
75 water, aquatic).

76 Represented by a cultured bacterial strain, IMCC26103. Gram-positive, aerobic, red-pigmented, non-  
77 motile, and chemoheterotrophic. Cells are curved rods with biovolume of 0.061  $\mu\text{m}^3$ , 0.49–1.23  $\mu\text{m}$  (average  
78 0.88  $\mu\text{m}$ ) long and 0.22–0.39  $\mu\text{m}$  (average 0.31  $\mu\text{m}$ ) wide. Grows in FAMV+CM+AA supplemented with >0.5 U

79 mL<sup>-1</sup> catalase but does not grow in any liquid medium devoid of catalase and on any solid agar medium. Growth  
80 occurs at 10–30°C (optimum, 25°C). D-Ribose and D-glucose enhance the cellular growth. Requires sulfur-  
81 containing amino acids (methionine and cysteine) but prefers cysteine. The major fatty acids (>10%) are C<sub>16:0</sub>  
82 (28.5%), C<sub>18:1 ω9c</sub> (25.8%), summed feature 3 (C<sub>16:1 ω7c</sub> and/or C<sub>16:1 ω7c</sub>, 12.3%), and C<sub>18:0</sub> (10.5%). Strain  
83 IMCC26103 has a genome size of 1.457 Mbp with DNA G+C content of 47.0%. The complete genome sequence  
84 of strain IMCC26103 is available in GenBank (CP029558). Phylogenetically belongs to the acI-A4 tribe.

85 The representative strain IMCC26103 was isolated from a freshwater lake, Lake Soyang, Republic of  
86 Korea, using a dilution-to-extinction culturing.

87

## 88 **Supplementary Materials and Methods**

### 89 **Measurement of bacterial cell densities**

90 Bacterial cell densities in all growth experiments were determined by flow cytometry (Guava easyCyte  
91 Plus, Millipore) as described previously [3, 4]. After 200 μL of bacterial cultures were stained with SYBR Green  
92 I (5× final concentration, Invitrogen) for 1 h, each stained sample was run for 10 s or until total cell counts  
93 reached 5000. To accurately measure the cell counts in the samples with high cell density, the stained sample  
94 was diluted to contain less than 200 cells μL<sup>-1</sup>.

95

### 96 **Measurement of *katG* expression by qPCR**

97 Strain IMCC25003 was grown in triplicate in 4 L of FAMV+CM+AA supplemented with 1 U mL<sup>-1</sup> of  
98 catalase until the early stationary phase. Each 4-L bacterial culture was harvested by centrifugation at 20,000 ×g  
99 for 120 min. To examine the expression of IMCC25003 *katG* and compare the relative level of gene expression  
100 according to H<sub>2</sub>O<sub>2</sub> concentrations, harvested cells were treated with different concentrations of H<sub>2</sub>O<sub>2</sub> (10, 50, and  
101 100 μM) for 30 min and untreated cells were used as a control. RNA was extracted using TRIzol (Sigma-  
102 Aldrich). Reverse transcription was performed with 1 μg of RNA using qPCRBIO cDNA Synthesis Kit  
103 (PCRBIO Systems) and real-time qPCR was conducted using qPCRBIO SyGreen Blue Mix Lo-ROX (PCRBIO  
104 Systems) in a real-time thermal cycler (Rotor-Gene 3000, Corbett Research). The *katG* primer set (forward, 5'-  
105 CATGGCGATGAATGATGAAG-3'; reverse, 5'-GCTGTTCTTCCAGCCAAGTC-3') for targeting *katG* of  
106 IMCC25003 was used to evaluate gene expression and the GAPDH gene of IMCC25003 was employed as a  
107 housekeeping gene with the GAPDH primer set (forward, 5'-GTTCAGCGACAGACCTCACA-3'; reverse, 5'-  
108 TGGTGAGCTGTGAATCGAAG-3').

109

### 110 **Expression, purification, and characterization of KatG from IMCC25003**

111 The gene encoding catalase-peroxidase (KatG) of IMCC25003 was amplified by PCR using the following  
112 primers: forward, 5'-CATATGATGACTCAAGAATCAACTCC-3'; reverse, 5'-  
113 CTCGAGTTACTTCTTCTTTGAC-3'. The PCR product was inserted into the pET-15b vector (Novagen) and  
114 expressed in *Escherichia coli* BL21 (DE3) using 1 mM isopropyl- $\beta$ -D-thiogalatoside (Sigma-Aldrich). The  
115 expressed KatG-His recombinant protein was purified using a gravity-flow Ni<sup>2+</sup>-nitrilotriacetic acid affinity  
116 column (Novagen). The high concentration of salts used for elution in the affinity column was removed using a  
117 PD-10 desalting column (GE Healthcare). To increase protein purity, the eluted fractions were applied to a  
118 Superose-12 FPLC column (10 × 300 mm, GE Healthcare) equilibrated with 50 mM potassium phosphate buffer  
119 (pH 7.0). The purified recombinant proteins were concentrated to approximately 10 mg mL<sup>-1</sup> in Centricon tubes  
120 (MWCO 10,000 Da; Millipore) and stored at 4°C. All purification steps were carried out at 4°C or on ice.

121 The native molecular weight of IMCC25003 KatG was determined by size exclusion chromatography on a  
122 Superose-12 FPLC column (10 × 300 mm, GE Healthcare) equilibrated with 50 mM potassium phosphate buffer  
123 (pH 7.0). The molecular weights of the subunits were determined by discontinuous sodium dodecyl sulfate-  
124 polyacrylamide gel electrophoresis (SDS-PAGE) according to the standard Laemmli method. Catalytic activity  
125 of recombinant IMCC25003 KatG was determined using a spectrophotometric assay by measuring the  
126 decomposition of H<sub>2</sub>O<sub>2</sub> at 240 nm. Catalase-specific activity was quantified by allowing varying amounts of  
127 enzyme (0–1.0  $\mu$ g for bovine catalase; 0–5.0  $\mu$ g for IMCC25003 KatG) to react with 5 mM H<sub>2</sub>O<sub>2</sub> in 50 mM  
128 potassium phosphate buffer (pH 7.0) at 25°C. The absorption coefficient at 240 nm, pH 7.0, and 25°C for H<sub>2</sub>O<sub>2</sub>  
129 was determined to be 49.8 M<sup>-1</sup> cm<sup>-1</sup>. Kinetic parameters were determined in triplicate from initial linear reaction  
130 rates of H<sub>2</sub>O<sub>2</sub> ranging from 1 to 10 mM. The apparent *K<sub>m</sub>* (mM) and *k<sub>cat</sub>* (s<sup>-1</sup>) values at these substrate  
131 concentrations were determined from a Lineweaver-Burk plots. Catalase from bovine liver was used as a  
132 positive control. In SDS-PAGE, staining for catalase activity was performed with the ferricyanide negative  
133 staining method using 2% (w/v) ferric chloride and 2% (w/v) potassium ferricyanide solution, and peroxidase  
134 activity was detected by double-staining with 3,3',5,5'-tetramethylbenzidine [5].

135

### 136 **Phylogenetic analyses based on 16S rRNA gene, whole genome, and KatG protein**

137 The 16S rRNA gene sequences of the *aci* genomes [6-8] were downloaded from the IMG database and  
138 GenBank, aligned using SINA online aligner, and imported into the ARB-SILVA database (SSURef NR 99,

139 release 123). Multiple alignments of the imported sequences and other reference sequences of the acI lineage  
140 were exported with the 'ssuref:bacteria' filter and used to construct a maximum-likelihood tree in RAxML 8.2.7  
141 with the GTRGAMMA model. Phylogenetic assignment of the sequences was performed as described by  
142 Newton *et al.* [9] and the recently proposed names for the two *Candidatus* genera [8].

143 To build phylogenomic trees, protein sequences predicted in 4 completed acI genomes [7] and single-cell  
144 genomes [6] and 16 recently published acI genomes [8] were downloaded from the IMG database and NCBI  
145 RefSeq database. Downloaded protein sequences were processed using CheckM [10], which produces  
146 concatenated alignment of 43 conserved proteins. This concatenated alignment was used to build a maximum-  
147 likelihood tree using RAxML 8.2.7 with the PROTGAMMAAUTO model.

148 A phylogenetic tree of KatG proteins was constructed to identify the phylogenetic positions of the KatGs  
149 found in the acI genomes. KatG proteins in the acI genomes (listed in Table S4) were searched by BLASTp  
150 using the KatG sequence of IMCC25003 as a query and acI protein sequences downloaded above as a search  
151 database, which revealed a total of 20 acI KatG proteins. Sequences collected for tree construction included the  
152 following: 20 acI KatG proteins, 16 KatG proteins showing high similarities to acI KatG proteins in BLASTp  
153 against the nr database of GenBank, 19 actinobacterial KatG proteins searched from the genomes representing  
154 diverse taxonomic groups of the phylum *Actinobacteria* [7], and >300 KatG proteins downloaded from  
155 PeroxiBase [11] (<http://peroxibase.toulouse.inra.fr>; Category 'Catalase peroxidase' of 'Class I peroxidase  
156 superfamily' under 'Non Animal peroxidase'). After sequence collection, several rounds of alignment and tree  
157 building were performed, and some sequences were excluded because of their short length, poor alignment, or  
158 unstable positioning. Finally, 303 KatG proteins were selected, aligned with Muscle [12] implemented in the  
159 MEGA 6 program, and used to construct a maximum likelihood tree using RAxML (version 8.2.7), with  
160 automatic model selection based on aic criterion (-m PROTGAMMAAUTO --auto-prot=aic). The selected  
161 model was LG likelihood with empirical base frequencies. Grouping of the KatG proteins was performed as  
162 described by Zamocky *et al.* [13].

163

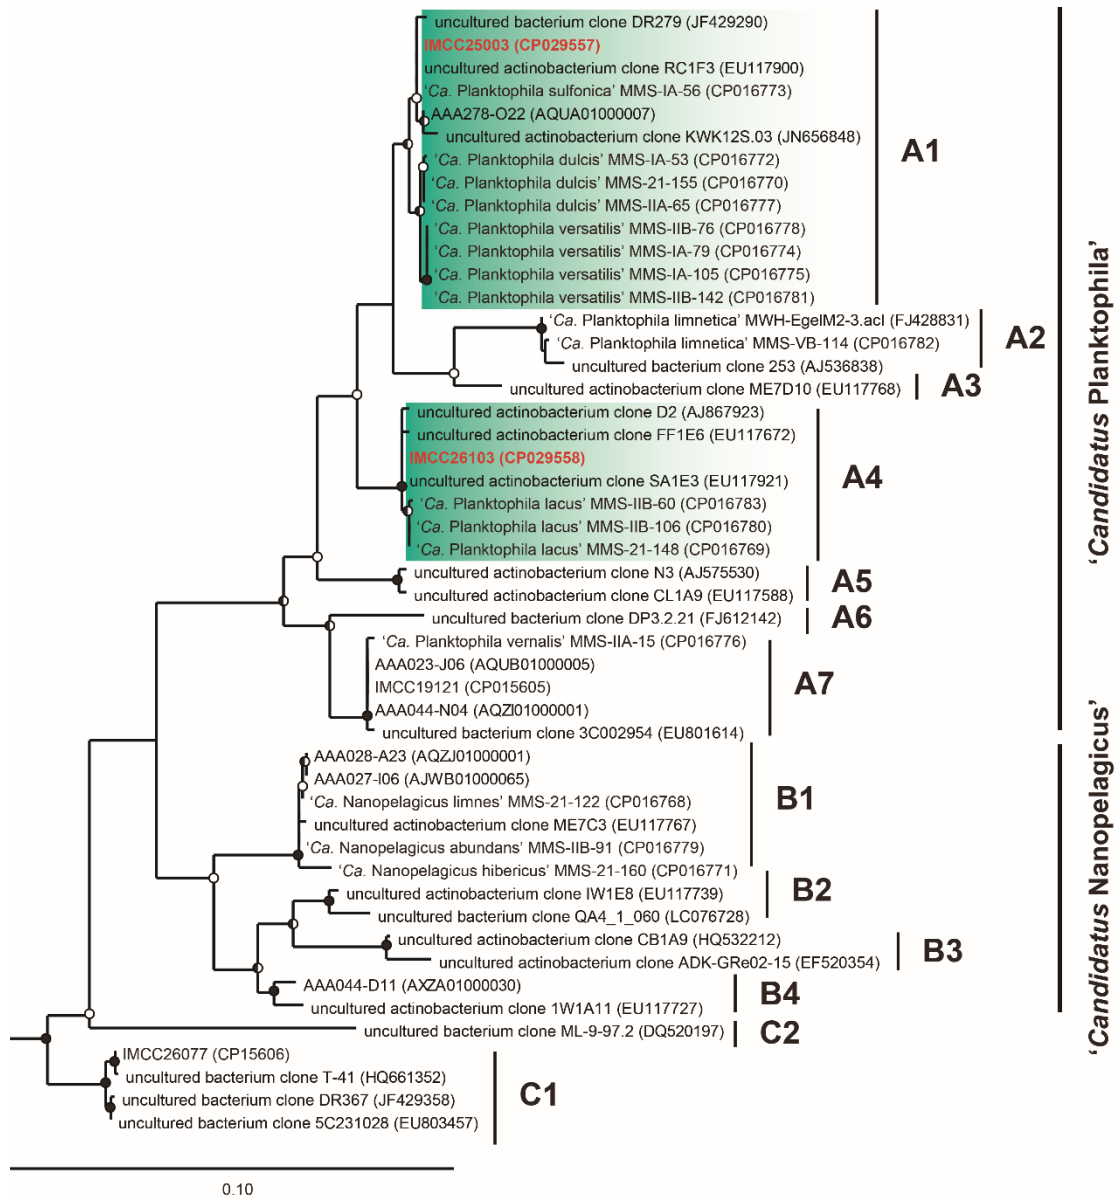

167 **Fig. S1.** Maximum-likelihood tree based on 16S rRNA gene sequences showing the phylogenetic position of  
 168 strains IMCC25003 and IMCC26103. The two strains isolated in this study are marked in red. *Streptomyces*  
 169 *sannanensis* (AB184579) and *Streptomyces griseus* (AY999909) were used as outgroup. Bootstrap supporting  
 170 values (from 600 replicates) are shown at the nodes as filled circles ( $\geq 90\%$ ), half-filled circles ( $\geq 70\%$ ), and  
 171 empty circles ( $\geq 50\%$ ). Bar, 0.10 substitutions per nucleotide position.

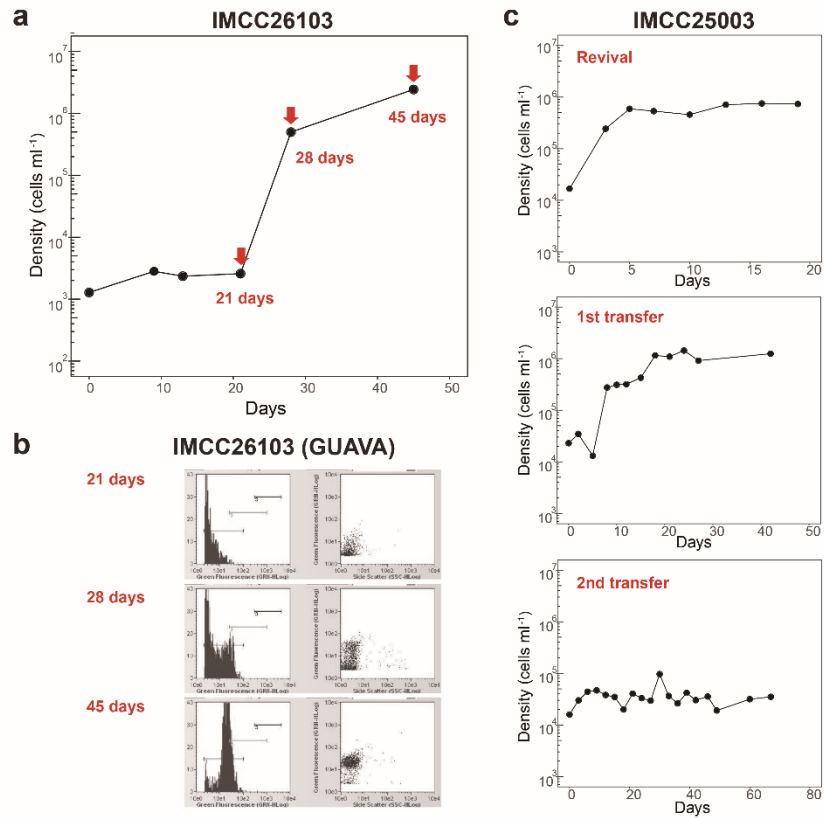

172

173 **Fig. S2** Revival and transfer cultures of strains IMCC25003 and IMCC26103. **a** Growth curve of a revival  
 174 culture of strain IMCC26103. **b** Flow cytometry plots of strain IMCC26103 obtained at the time points indicated  
 175 in **(a)**. Left, histograms showing the distribution of cell counts (y-axis) according to the green fluorescence (x-  
 176 axis); Right, dot plots showing the distribution of cells according to side scatter (x-axis) and green fluorescence  
 177 (y-axis). **c** Revival and two subsequent transfer cultures of strain IMCC25003.



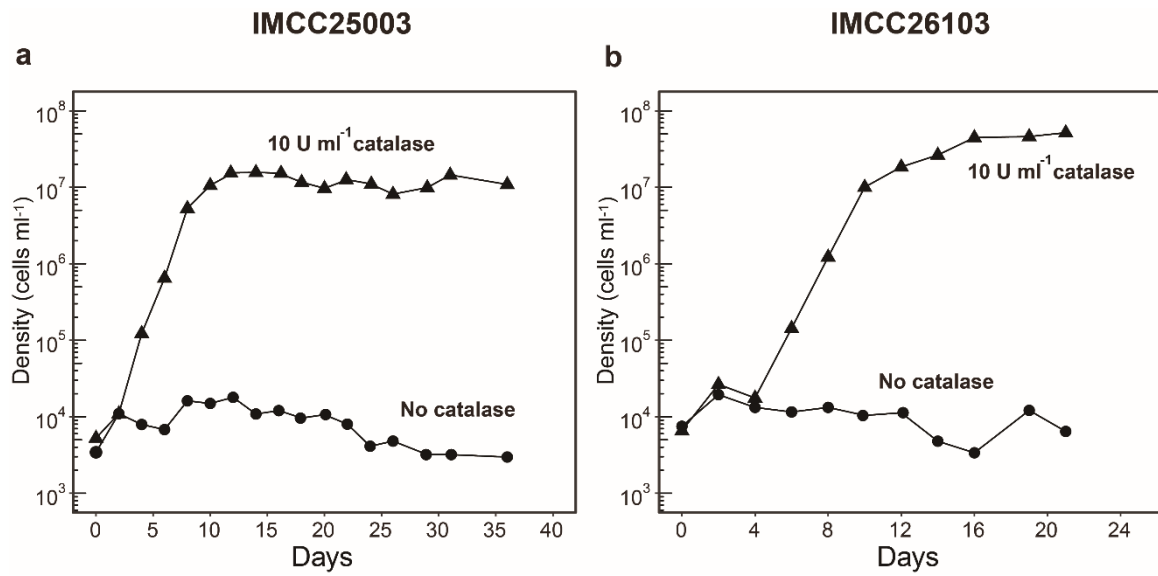

178

179 **Fig. S3** Growth curves of strains IMCC25003 (**a**) and IMCC26103 (**b**) obtained from the revival experiment of  
 180 frozen glycerol stocks using culture medium (FAMV+CM+AA) supplemented with catalase. The triangle  
 181 symbol represents growth in the medium amended with 10 U mL<sup>-1</sup> catalase, while the circle symbol represents  
 182 growth in the medium without catalase.

183

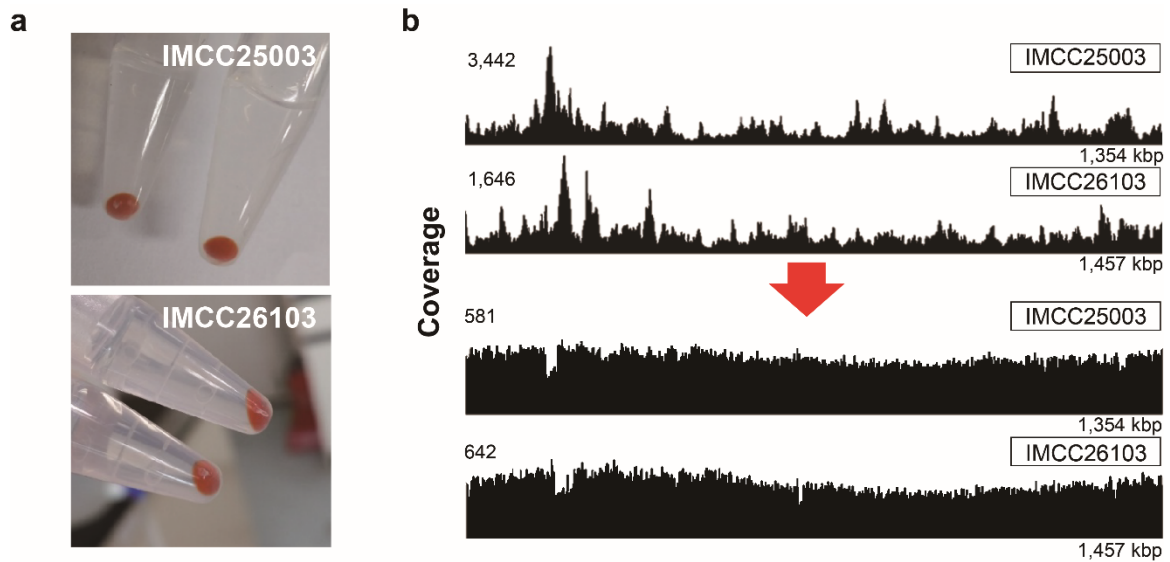

184

185 **Fig. S4** Genome sequencing using genomic DNA extracted from cultured and harvested cell pellets of the acI  
 186 strains. **a** Cell pellets obtained by centrifugation from 4-L cultures of IMCC25003 (upper) and IMCC26103  
 187 (lower). Genomic DNA extracted from these cell pellets were used for genome sequencing. **b** Coverage variation  
 188 across the complete genome sequences of the acI strains. The two coverage plots above red arrow were obtained  
 189 from our previous study using whole genome amplification (WGA) [7]. The two coverage plots below the arrow  
 190 were obtained from this study using large-scale cultures without WGA. Coverage variation was calculated using  
 191 a 25-bp window based on read mapping. Bar heights were normalized in each plot and the maximum coverages  
 192 are indicated at the upper left corner of each plot.

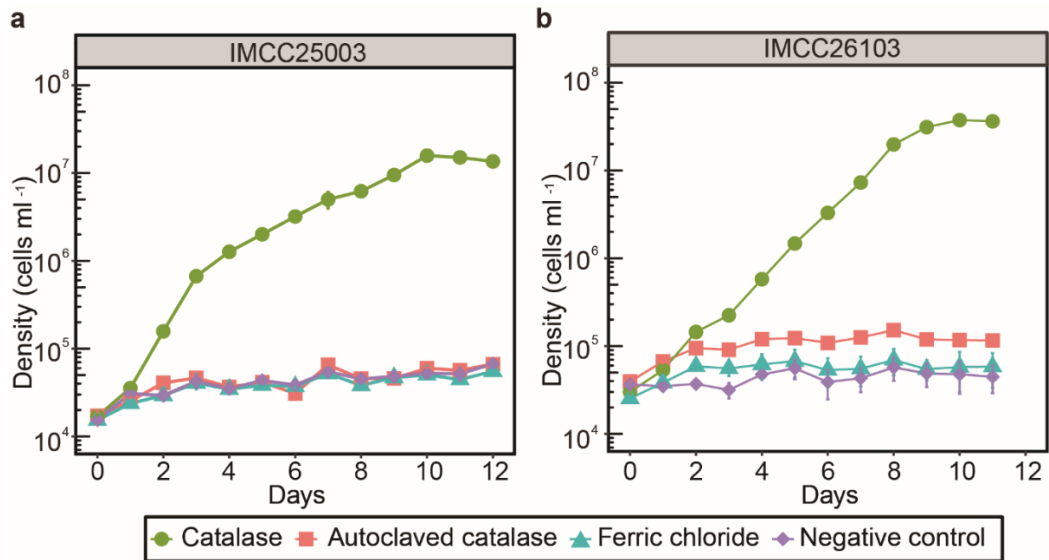

193

194 **Fig. S5** Growth of strains IMCC25003 (a) and IMCC26103 (b) in culture media supplemented with catalase,  
 195 autoclaved catalase, or ferric chloride. Catalase, 10 U mL<sup>-1</sup> of bovine catalase; Autoclaved catalase, 10 U mL<sup>-1</sup> of  
 196 bovine catalase autoclaved for 2 hrs; Ferric chloride, 100 nM of FeCl<sub>3</sub>; Negative control, no supplement. All  
 197 experiments were performed in duplicate using the culture medium FAMV+CM+AA. Error bars indicate  
 198 standard error. Note that error bars shorter than the size of the symbols are hidden.

199

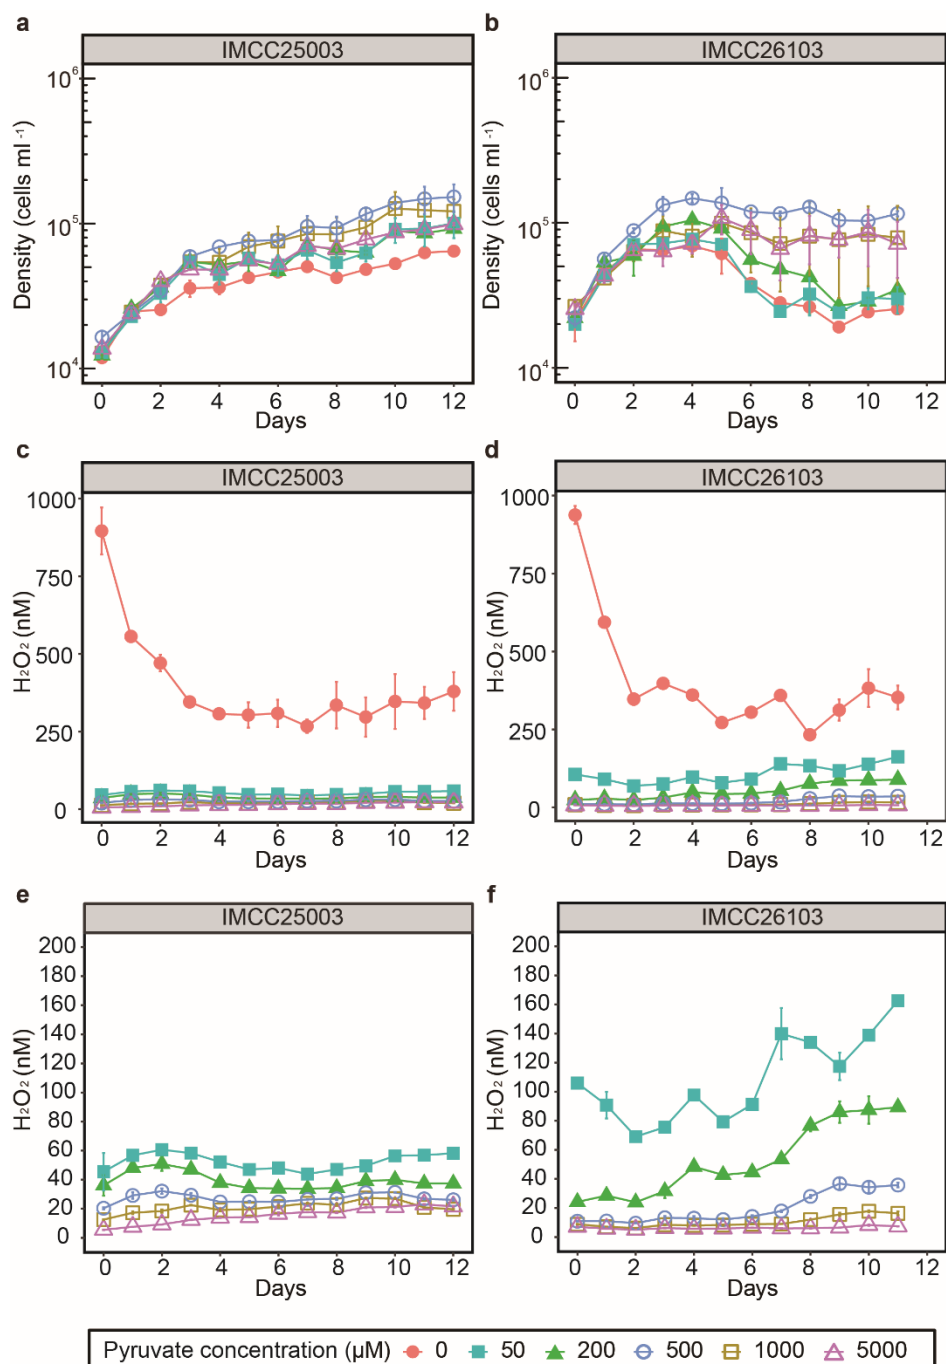

200

201 **Fig. S6** Effects of pyruvate concentration on the growth of *acI* strains and  $H_2O_2$  concentration of media during  
 202 cultivation. Various concentrations (0–5 mM) of pyruvate were added to the culture medium FAMV+CM+AA  
 203 (without pyruvate) for experiments. **a** and **b** The growth of strains IMCC25003 (**a**) and IMCC26103 (**b**). **c-f**  
 204 Changes in  $H_2O_2$  concentration during cultivation of strains IMCC25003 (**c** and **e**) and IMCC26103 (**d** and **f**).

205 Note that the figures **e** and **f** show the same data as the figures **c** and **d**, respectively, with different y-axis scales.

206 All experiments were performed in duplicate. Error bars indicate standard error. Note that error bars shorter than  
 207 the size of the symbols are hidden.

208

209

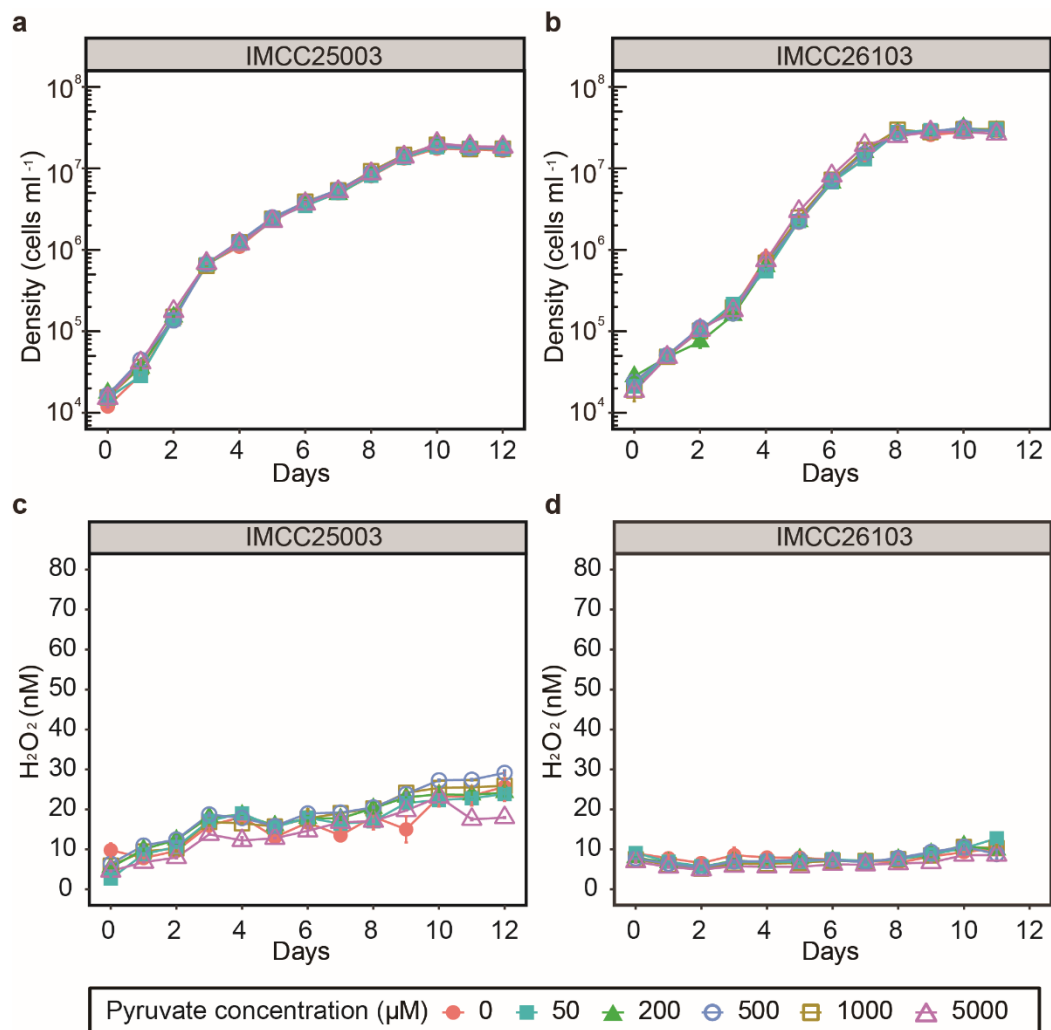

210  
211

212 **Fig. S7** Combined effects of catalase and various concentrations of pyruvate on the growth of acI strains and  
 213 H<sub>2</sub>O<sub>2</sub> concentration of media during cultivation. Various concentrations (0–5 mM) of pyruvate were added to the  
 214 culture medium FAMV+CM+AA (without pyruvate) supplemented with catalase (10 U mL<sup>-1</sup>) for experiments. **a**  
 215 and **b** The growth of strains IMCC25003 (**a**) and IMCC26103 (**b**). **c-d** Changes in H<sub>2</sub>O<sub>2</sub> concentration during  
 216 cultivation of strains IMCC25003 (**c**) and IMCC26103 (**d**). All experiments were performed in duplicate. Error  
 217 bars indicate standard error. Note that error bars shorter than the size of the symbols are hidden.

218

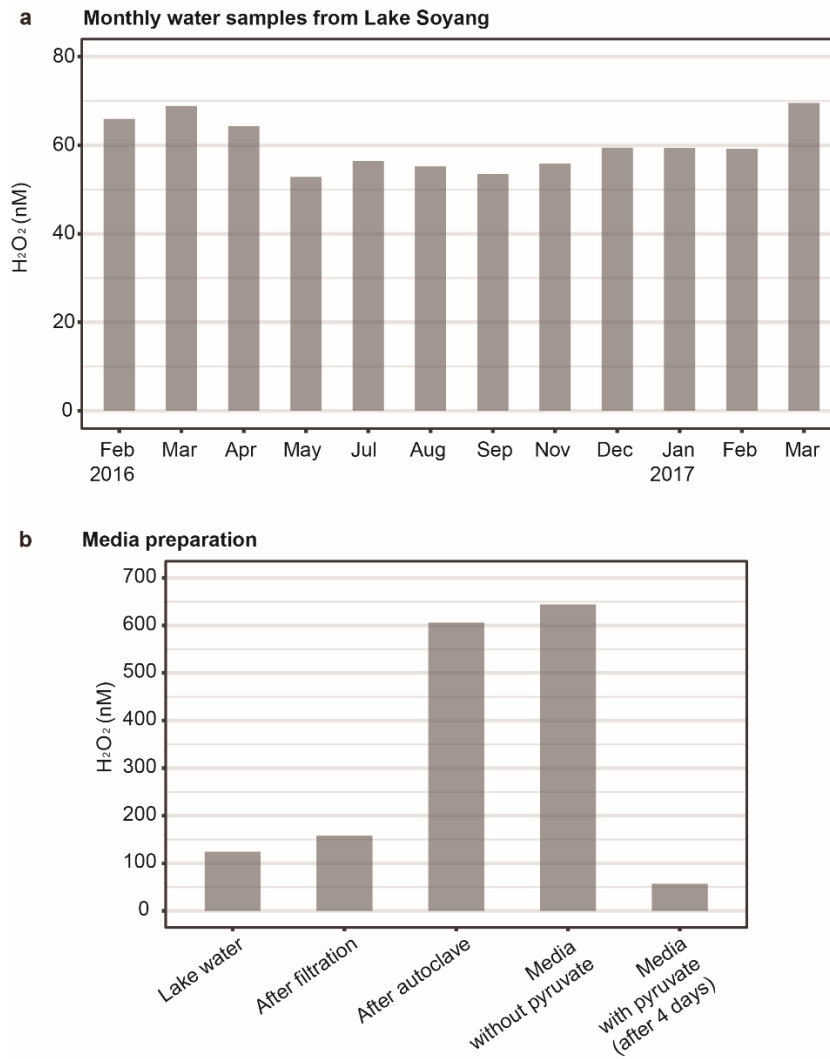

219

220 **Fig. S8** H<sub>2</sub>O<sub>2</sub> concentration of water samples collected monthly from the surface of Lake Soyang (**a**) and the

221 change in H<sub>2</sub>O<sub>2</sub> concentration during preparation of the basal culture medium FAMV+CM+AA (**b**).

222

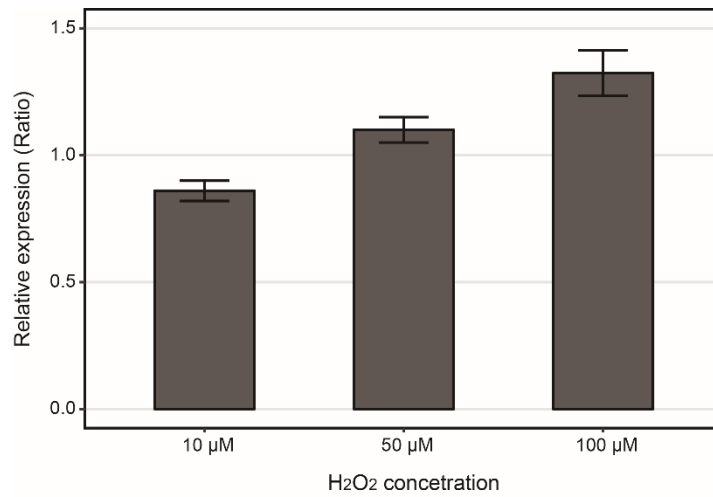

223

224 **Fig. S9** Increase in IMCC25003 *katG* expression with increasing concentration of H<sub>2</sub>O<sub>2</sub>. Cells of IMCC25003  
225 were treated with 3 different H<sub>2</sub>O<sub>2</sub> concentrations (10, 50, and 100 μM) for 30 min and total RNA was used for  
226 the analysis of *katG* expression by qPCR. Expression level of *katG* in H<sub>2</sub>O<sub>2</sub>-treated cultures was compared with  
227 that in the control cultures (no H<sub>2</sub>O<sub>2</sub> treatment). FAMV+CM+AA was used as the culture medium. Error bars  
228 indicate standard deviations ( $n = 3$ ).

229

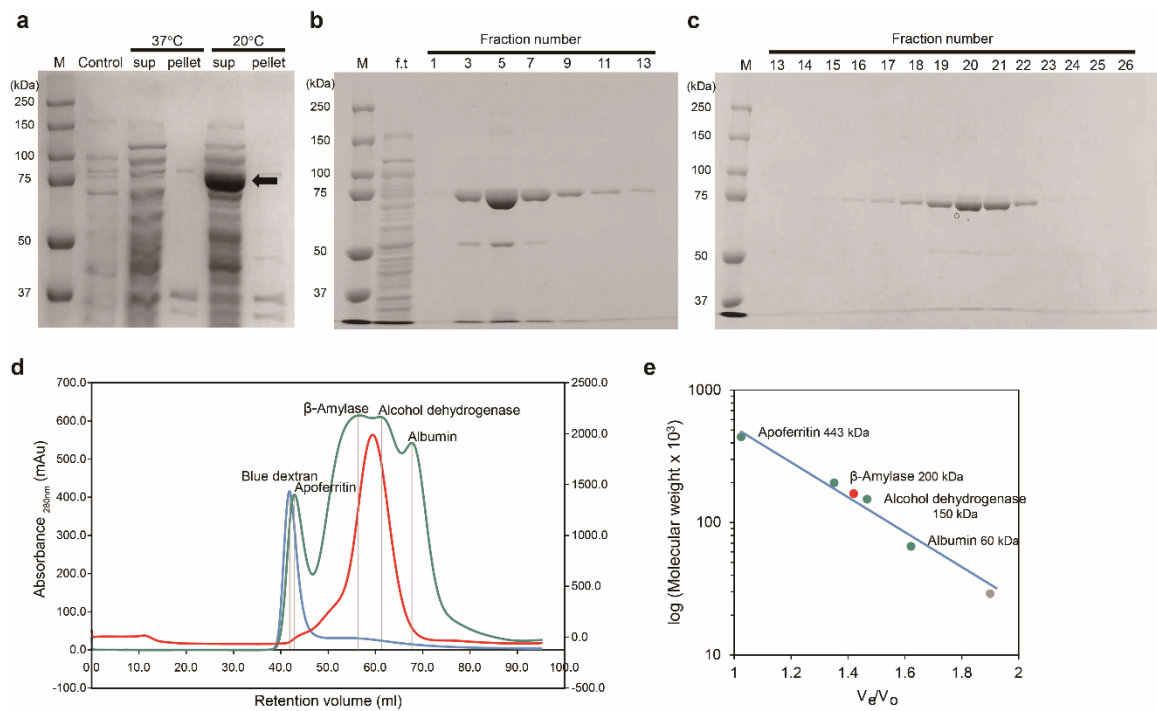

230

231 **Fig. S10** Expression, purification, and determination of native molecular weight of recombinant IMCC25003  
 232 KatG. **a** Expression of IMCC25003 KatG in *E. coli* analyzed by SDS-PAGE. The bold arrow indicates a band of  
 233 KatG, which is approximately 82.6 kDa. M, molecular weight size marker; control, before induction of  
 234 expression; sup, supernatant; pellet, cell debris and membrane. Purified IMCC25003 KatG bound to a Ni<sup>2+</sup>-  
 235 nitrilotriacetic acid affinity column (**b**) and the purified protein through a size exclusion superpose-12 column  
 236 (**c**), confirmed by SDS-PAGE. M, molecular weight size marker; f.t., unbound flow through fraction.  
 237 Chromatograms (**d**) of protein-molecular-weight size markers and IMCC25003 KatG, and the molecular-weight  
 238 calibration curve (**e**) obtained from protein-molecular-weight size markers and IMCC25003 KatG. The  
 239 chromatogram colored in red and the red dot on the calibration curve represent IMCC25003 KatG.

240



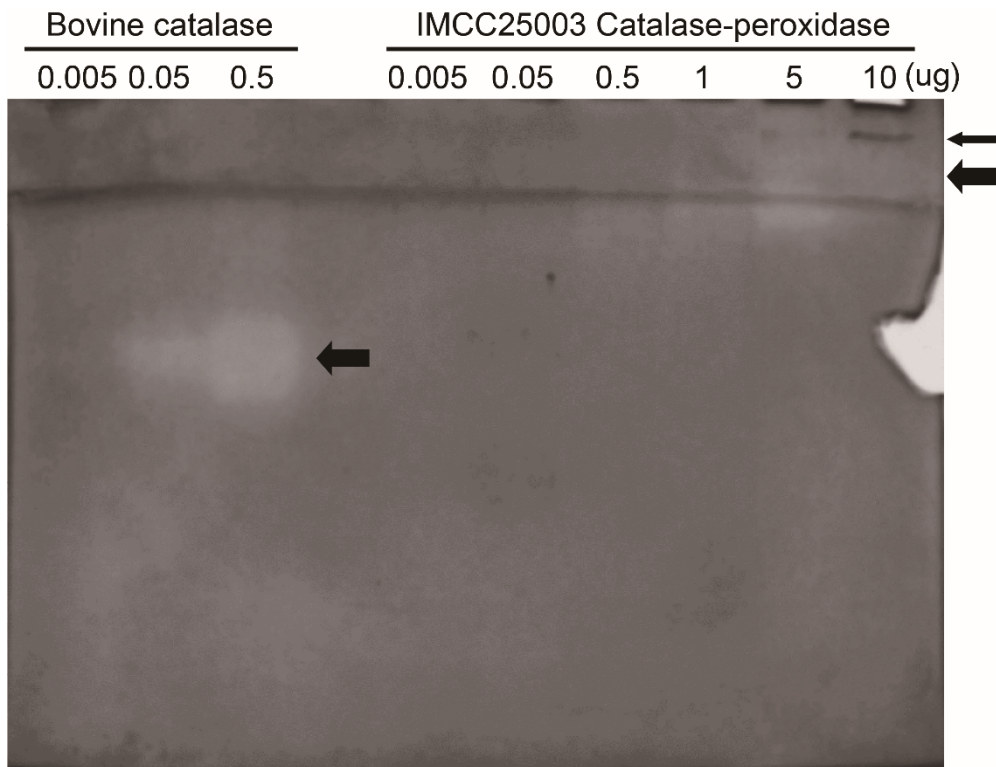

241

242 **Fig. S11** Catalase and peroxidase activities of purified IMCC25003 KatG and bovine catalase (KatE). Bovine  
 243 catalase [0.005 (0.01 U), 0.05 (0.1 U), and 0.5 (1 U)  $\mu$ g] and IMCC25003 KatG (0.005, 0.05, 0.5, 1, 5, and 10  
 244  $\mu$ g) were separated by 8% non-denaturing PAGE. The bold arrows indicate negatively stained catalase activity  
 245 and the narrow arrow indicates peroxidase activity stained by 3,3',5,5'-tetramethylbenzidine.

246

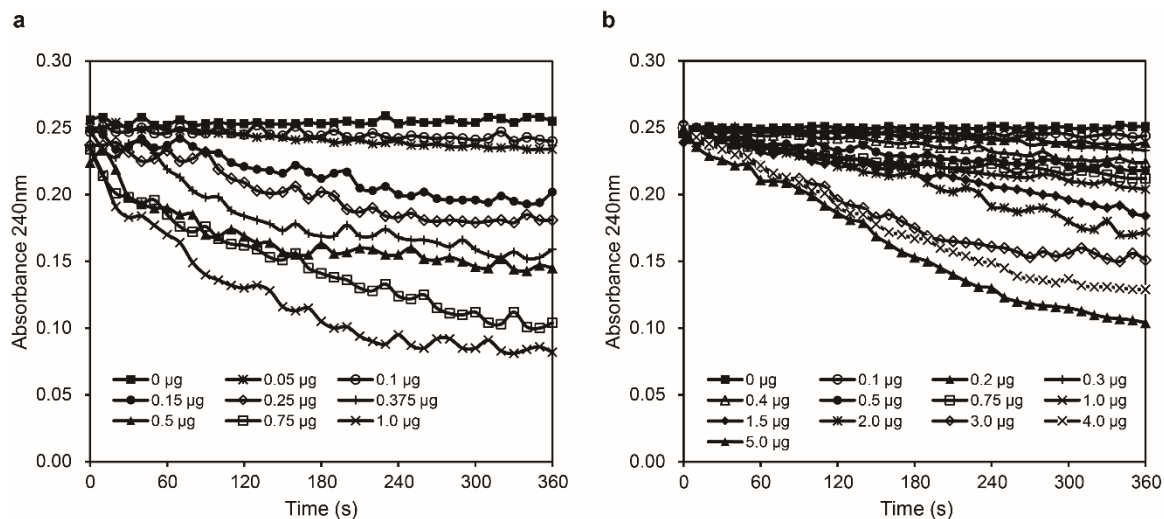

247

248 **Fig. S12** Kinetic curves of H<sub>2</sub>O<sub>2</sub> decomposition by IMCC25003 KatG and bovine catalase. The curves of  
 249 absorbance at 240 nm over time were generated using varying quantities of (a) bovine catalase (0–1.0 µg) and  
 250 (b) IMCC25003 KatG (0–5.0 µg).

251

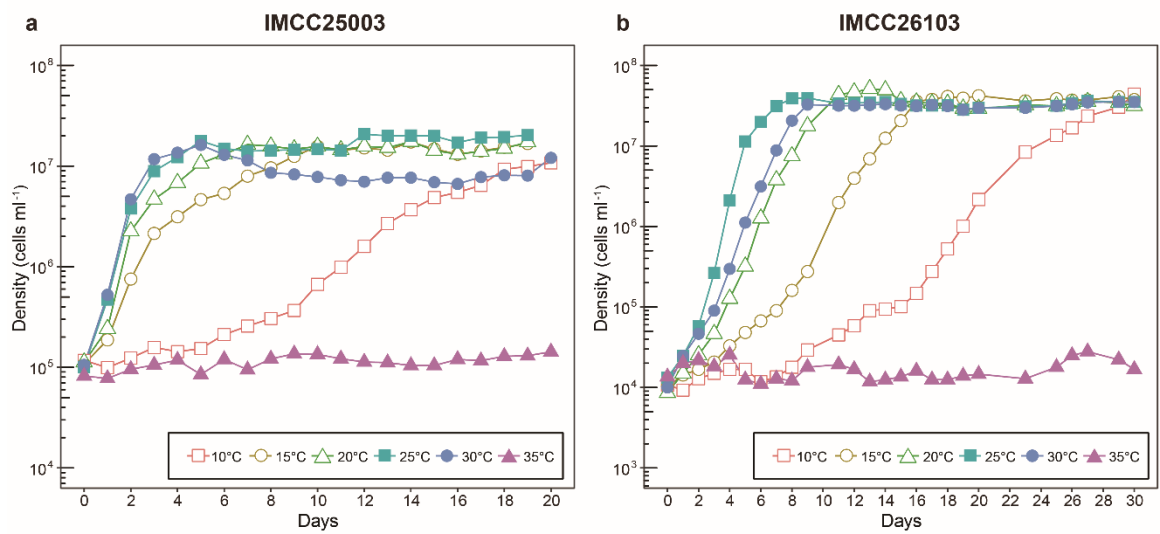

252

253 **Fig. S13** Growth curves of strain IMCC25003 (a) and strain IMCC26103 (b) at different temperatures.

254

255 **Supplementary Tables**

256

257 **Table S1** Media used in this study and their composition.

| <b>Components of media</b>               |                                                                                 |                     |
|------------------------------------------|---------------------------------------------------------------------------------|---------------------|
| Components (abbreviation)                | Compound(s)                                                                     | Final concentration |
| Ammonium (N)                             | NH <sub>4</sub> Cl                                                              | 10 μM               |
| Phosphate (P)                            | KH <sub>2</sub> PO <sub>4</sub>                                                 | 10 μM               |
| Trace metals (TM)                        | FeCl <sub>3</sub> ·6H <sub>2</sub> O                                            | 117 nM              |
|                                          | MnCl <sub>2</sub> ·4H <sub>2</sub> O                                            | 9 nM                |
|                                          | ZnSO <sub>4</sub> ·7H <sub>2</sub> O                                            | 800 pM              |
|                                          | CoCl <sub>2</sub> ·6H <sub>2</sub> O                                            | 500 pM              |
|                                          | Na <sub>2</sub> MoO <sub>4</sub> ·2H <sub>2</sub> O                             | 300 pM              |
|                                          | Na <sub>2</sub> SeO <sub>3</sub>                                                | 1 nM                |
|                                          | NiCl <sub>2</sub> ·6H <sub>2</sub> O                                            | 1 nM                |
|                                          | Vitamin mixture (V)                                                             | Thiamine·HCl        |
| Niacin                                   |                                                                                 | 81 nM               |
| Ca-Pantothenate                          |                                                                                 | 84 nM               |
| Pyridoxine                               |                                                                                 | 59 nM               |
| Biotin                                   |                                                                                 | 409 pM              |
| Folic acid                               |                                                                                 | 453 pM              |
| Vitamin B12                              |                                                                                 | 70 pM               |
| Myo-inositol                             |                                                                                 | 555 nM              |
| <i>p</i> -Aminobenzoic Acid              |                                                                                 | 7 nM                |
| Carbon mixture (CM)                      | Pyruvate                                                                        | 50 μM               |
|                                          | D-Glucose                                                                       | 5 μM                |
|                                          | <i>N</i> -Acetyl-D-glucosamine                                                  | 5 μM                |
|                                          | D-Ribose                                                                        | 5 μM                |
|                                          | Methyl alcohol                                                                  | 5 μM                |
| 20 proteinogenic amino acid mixture (AA) | Each amino acid                                                                 | 100 nM, each        |
| <b>Media definition</b>                  |                                                                                 |                     |
| Media                                    | Definition                                                                      |                     |
| FAM                                      | 0.2 μm-filtered and autoclaved freshwater medium supplemented with N, P, and TM |                     |
| FAMV                                     | FAM supplemented with V                                                         |                     |
| FAMV+CM                                  | FAMV supplemented with CM                                                       |                     |
| FAMV+AA                                  | FAMV supplemented with AA                                                       |                     |
| FAMV+CM+AA                               | FAMV supplemented with CM and AA                                                |                     |

258

259 **Table S2** Trials to establish pure culture of strain IMCC25003.

| Trial       | Media composition         | Additional substrate                                                              | Reference            |
|-------------|---------------------------|-----------------------------------------------------------------------------------|----------------------|
| 1st attempt | FAMV                      |                                                                                   |                      |
|             | FAMV+CM                   |                                                                                   |                      |
|             | FAMV+AA                   | 0.5×, 1×, 5×, and 10× of CM                                                       |                      |
|             | AFM <sup>a</sup> +V+CM+AA |                                                                                   |                      |
|             | FM <sup>b</sup> +V+CM+AA  |                                                                                   |                      |
| 2nd attempt | FAMV+CM+AA                | 20 μM acetate                                                                     | [14]                 |
|             |                           | 20 μM oxaloacetate                                                                | [6]                  |
|             |                           | 20 μM putrescine                                                                  | [6, 15]              |
|             |                           | 20 μM glycerol                                                                    | [6]                  |
|             |                           | 20 μM xylose                                                                      | [15, 16]             |
|             |                           | 1 mg L <sup>-1</sup> proteose peptone No. 3<br>1 mg L <sup>-1</sup> yeast extract |                      |
| 3rd attempt | FAMV+CM+AA                | 1:20 diluted spent medium <sup>c</sup>                                            | [15, 17], This study |
| 4th attempt | FAMV+CM+AA                | 10 U mL <sup>-1</sup> catalase                                                    |                      |

260 <sup>a</sup>AFM, Artificial freshwater medium [18]. <sup>b</sup>FM, 0.1 μm-filtered but non-autoclaved freshwater medium. <sup>c</sup>Spent  
261 medium, a spent medium of the genus *Limnohabitans* filtrated through 0.1 μm pore-size membrane after  
262 cultivation of *Limnohabitans* sp. IMCC26003. For the media abbreviations, refer to Supplementary Table S1.

263

**Table S3** Kinetic parameters of various catalase-peroxidases and bovine catalase.

| Source                                               | Molecular weight | Structure | Specific activity (Units mg <sup>-1</sup> ) | K <sub>m</sub> (mM) | k <sub>cat</sub> (s <sup>-1</sup> ) | k <sub>cat</sub> /K <sub>m</sub> (M <sup>-1</sup> s <sup>-1</sup> ) | pI               | Reference  |
|------------------------------------------------------|------------------|-----------|---------------------------------------------|---------------------|-------------------------------------|---------------------------------------------------------------------|------------------|------------|
| IMCC25003 <sup>a</sup>                               | 165,000          | A2        | 179.3                                       | 11.7                | 9.05 × 10 <sup>2</sup>              | 7.74 × 10 <sup>4</sup>                                              | 7.6 <sup>b</sup> | This study |
| <i>Archaeoglobus fulgidus</i> <sup>a</sup>           | NA               | NA        | 5,280                                       | 3.8                 | 7.77 × 10 <sup>3</sup>              | 2.04 × 10 <sup>6</sup>                                              | 5.6 <sup>b</sup> | [19]       |
| <i>Bacillus selenatarsenatis</i> SF-1                | 165,000          | A2        | 3,375                                       | 2.6                 | 1.15 × 10 <sup>4</sup>              | 4.41 × 10 <sup>6</sup>                                              | 6.0              | [20]       |
| <i>Burkholderia pseudomallei</i> <sup>a</sup>        | NA               | NA        | 3,630                                       | 4.5                 | 5.68 × 10 <sup>3</sup>              | 1.26 × 10 <sup>6</sup>                                              | 5.9 <sup>b</sup> | [19]       |
| <i>Escherichia coli</i> K10                          | 337,000          | A4        | 1,486.5                                     | 3.9                 | 1.63 × 10 <sup>4</sup>              | 4.19 × 10 <sup>6</sup>                                              | 5.1 <sup>b</sup> | [21]       |
| <i>Escherichia coli</i> O157:H7                      | NA               | NA        | NA                                          | 4.0                 | 1.40 × 10 <sup>4</sup>              | 3.50 × 10 <sup>6</sup>                                              | 5.1 <sup>b</sup> | [22]       |
| <i>Geobacillus stearothermophilus</i> <sup>a</sup>   | NA               | NA        | 3,120                                       | 4.4                 | 1.40 × 10 <sup>3</sup>              | 3.18 × 10 <sup>5</sup>                                              | 5.2              | [23]       |
| <i>Halobacterium salinarum</i>                       | 240,000          | A4        | 43.2                                        | 3.7                 | NA                                  | NA                                                                  | 3.8              | [24]       |
| <i>Mycobacterium smegmatis</i>                       | NA               | NA        | NA                                          | 1.4                 | 2.38 × 10 <sup>3</sup>              | 1.70 × 10 <sup>6</sup>                                              | 5.0 <sup>b</sup> | [25]       |
| <i>Mycobacterium tuberculosis</i> <sup>a</sup>       | 175,000          | A2        | 2,420                                       | 5.2                 | 1.01 × 10 <sup>4</sup>              | 1.94 × 10 <sup>6</sup>                                              | 5.1              | [26]       |
| <i>Rhodobacter capsulatus</i>                        | 236,000          | A4        | 7,800                                       | 4.2                 | NA                                  | NA                                                                  | 4.5              | [27]       |
| <i>Rhodobacter capsulatus</i> <sup>a</sup>           | NA               | NA        | 4,830                                       | 3.7                 | 6.64 × 10 <sup>3</sup>              | 1.79 × 10 <sup>6</sup>                                              | 5.1 <sup>b</sup> | [19]       |
| <i>Synechococcus elongatus</i> PCC 6301 <sup>a</sup> | 165,000          | A2        | 1,491                                       | 4.8                 | 8.85 × 10 <sup>3</sup>              | 1.84 × 10 <sup>6</sup>                                              | 4.6              | [28]       |
| <i>Synechococcus elongatus</i> PCC 6301              | 165,000          | A2        | NA                                          | 4.3                 | 7.20 × 10 <sup>3</sup>              | 1.67 × 10 <sup>6</sup>                                              | 5.1 <sup>b</sup> | [29]       |
| <i>Synechococcus elongates</i> PCC 7942 <sup>a</sup> | NA               | NA        | NA                                          | 4.2                 | 2.60 × 10 <sup>4</sup>              | 6.19 × 10 <sup>6</sup>                                              | 5.1 <sup>b</sup> | [30]       |
| <i>Synechocystis</i> sp. PCC 6803 <sup>a</sup>       | 170,000          | A2        | 5,420                                       | 4.9                 | 3.50 × 10 <sup>3</sup>              | 7.14 × 10 <sup>2</sup>                                              | 5.4              | [31]       |
| <i>Thermoascus aurantiacus</i>                       | 330,000          | A4        | NA                                          | 48.0                | 1.07 × 10 <sup>5</sup>              | 2.22 × 10 <sup>6</sup>                                              | 4.5              | [32]       |
| <i>Thermus brockianus</i>                            | 178,000          | A4        | 5,300                                       | 35.5                | 6.00 × 10 <sup>3</sup>              | 1.69 × 10 <sup>5</sup>                                              | 4.7              | [33]       |
| <i>Bos taurus</i> <sup>c</sup>                       | 240,000          | A4        | 1980.3                                      | 20.6                | 3.68 × 10 <sup>4</sup>              | 1.79 × 10 <sup>6</sup>                                              | 5.4              | This study |

265 <sup>a</sup>Biochemical properties were determined using recombinant catalase-peroxidase. <sup>b</sup>Theoretical pI values were estimated based on amino acids sequences. <sup>c</sup>The

266 monofunctional bovine catalase which was amended to culture media of IMCC25003 was used as an experimental positive control. NA, not available.

**Table S4** List of acI genomes used in this study and the presence or absence of *katG* gene.

| Tribe                                      | Organism name                             | Genome ID               | Isolation site    | Complete | No. of Scaffolds | Genome size (bp) | Length of KatG (aa) |
|--------------------------------------------|-------------------------------------------|-------------------------|-------------------|----------|------------------|------------------|---------------------|
| A1                                         | Actinobacteria bacterium IMCC25003        | 2602042019 <sup>a</sup> | Lake Soyang       | O        | 1                | 1,353,947        | 746                 |
|                                            | actinobacterium SCGC AAA278-O22           | 2236661007 <sup>a</sup> | Lake Mendota      | X        | 43               | 1,138,490        | X                   |
|                                            | actinobacterium SCGC AAA027-M14           | 2236661003 <sup>a</sup> | Lake Mendota      | X        | 22               | 822,296          | 725                 |
|                                            | 'Ca. Planktophilia dulcis' MMS-IIA-65     | CP016777 <sup>b</sup>   | Lake Zurich       | O        | 1                | 1,348,019        | 732                 |
|                                            | 'Ca. Planktophilia dulcis' MMS-IA-53      | CP016772 <sup>b</sup>   | Lake Zurich       | O        | 1                | 1,365,934        | 732                 |
|                                            | 'Ca. Planktophilia dulcis' MMS-21-155     | CP016770 <sup>b</sup>   | Lake Zurich       | O        | 1                | 1,361,776        | 732                 |
|                                            | 'Ca. Planktophilia sulfonica' MMS-IA-56   | CP016773 <sup>b</sup>   | Lake Zurich       | O        | 1                | 1,344,614        | 747                 |
|                                            | 'Ca. Planktophilia versatilis' MMS-IIB-76 | CP016778 <sup>b</sup>   | Lake Zurich       | O        | 1                | 1,325,420        | 733                 |
|                                            | 'Ca. Planktophilia versatilis' MMS-IA-79  | CP016774 <sup>b</sup>   | Lake Zurich       | O        | 1                | 1,331,009        | 733                 |
|                                            | 'Ca. Planktophilia versatilis' MMS-IA-105 | CP016775 <sup>b</sup>   | Lake Zurich       | O        | 1                | 1,326,591        | 733                 |
| 'Ca. Planktophilia versatilis' MMS-IIB-142 | CP016781 <sup>b</sup>                     | Lake Zurich             | O                 | 1        | 1,266,983        | 733              |                     |
| A2                                         | 'Ca. Planktophilia limnetica' MMS-VB-114  | CP016782 <sup>b</sup>   | Lake Zurich       | O        | 1                | 1,328,793        | 722                 |
| A4                                         | Actinobacteria bacterium IMCC26103        | 2602042020 <sup>a</sup> | Lake Soyang       | O        | 1                | 1,456,516        | X                   |
|                                            | 'Ca. Planktophilia lacus' MMS-IIB-106     | CP016780 <sup>b</sup>   | Lake Zurich       | O        | 1                | 1,384,812        | 721                 |
|                                            | 'Ca. Planktophilia lacus' MMS-IIB-60      | CP016783 <sup>b</sup>   | Lake Zurich       | O        | 1                | 1,410,107        | 721                 |
|                                            | 'Ca. Planktophilia lacus' MMS-21-148      | CP016769 <sup>b</sup>   | Lake Zurich       | O        | 1                | 1,460,061        | 721                 |
| A5                                         | actinobacterium SCGC AAA044-O16           | 2606217200 <sup>a</sup> | NA                | X        | 17               | 1,313,698        | 718                 |
|                                            | actinobacterium SCGC AAA028-G02           | 2606217191 <sup>a</sup> | NA                | X        | 18               | 1,231,401        | 718                 |
| A6                                         | actinobacterium SCGC AAA028-E20           | 2602042080 <sup>a</sup> | NA                | X        | 19               | 727,714          | X                   |
|                                            | actinobacterium SCGC AAA028-I14           | 2619618809 <sup>a</sup> | NA                | X        | 11               | 623,569          | 717                 |
| A7                                         | Actinobacteria bacterium IMCC19121        | 2606217181 <sup>a</sup> | Lake Soyang       | O        | 1                | 1,506,415        | X                   |
|                                            | actinobacterium SCGC AAA044-N04           | 2236661005 <sup>a</sup> | Damariscotta Lake | X        | 23               | 1,286,658        | 718                 |
|                                            | actinobacterium SCGC AAA024-D14           | 2264265190 <sup>a</sup> | Sparkling Lake    | X        | 82               | 778,696          | X                   |
|                                            | actinobacterium SCGC AAA023-J06           | 2236661001 <sup>a</sup> | Sparkling Lake    | X        | 98               | 695,943          | X                   |
|                                            | 'Ca. Planktophilia vernalis' MMS-IIA-15   | CP016776 <sup>b</sup>   | Lake Zurich       | O        | 1                | 1,364,004        | 718                 |
| B1                                         | actinobacterium SCGC AAA027-L06           | 2505679121 <sup>a</sup> | Lake Mendota      | X        | 75               | 1,163,583        | X                   |
|                                            | actinobacterium SCGC AAA027-J17           | 2236661002 <sup>a</sup> | Lake Mendota      | X        | 81               | 966,755          | X                   |
|                                            | actinobacterium SCGC AAA278-I18           | 2236661006 <sup>a</sup> | Damariscotta Lake | X        | 54               | 944,397          | X                   |

|    |                                          |                         |                |   |    |           |     |
|----|------------------------------------------|-------------------------|----------------|---|----|-----------|-----|
|    | actinobacterium SCGC AAA028-A23          | 2236661004 <sup>a</sup> | Lake Mendota   | X | 64 | 833,294   | X   |
|    | actinobacterium SCGC AAA023-D18          | 2236661009 <sup>a</sup> | Sparkling Lake | X | 67 | 753,259   | X   |
|    | actinobacterium SCGC AB141-P03           | 2236876028 <sup>a</sup> | Lake Stechlin  | X | 66 | 660,403   | X   |
|    | 'Ca. Nanopelagicus limnes' MMS-21-122    | CP016768 <sup>b</sup>   | Lake Zurich    | O | 1  | 1,238,108 | X   |
|    | 'Ca. Nanopelagicus hibericus' MMS-21-160 | CP016771 <sup>b</sup>   | Lake Zurich    | O | 1  | 1,223,088 | X   |
|    | 'Ca. Nanopelagicus abundans' MMS-IIB-91  | CP016779 <sup>b</sup>   | Lake Zurich    | O | 1  | 1,161,863 | X   |
| B4 | actinobacterium SCGC AAA044-D11          | 2619618811 <sup>a</sup> | NA             | X | 18 | 1,095,756 | 719 |
| C1 | Actinobacteria bacterium IMCC26077       | 2602042021 <sup>a</sup> | Lake Soyang    | O | 1  | 1,551,612 | X   |

269 <sup>a</sup>IMG Genome ID (IMG Taxon ID). <sup>b</sup>GenBank accession number. NA, not available.

270



271

**Table S5** Fatty acids composition (%) of two acI strains.

| Fatty acid                                                              | IMCC25003 | IMCC26103 |
|-------------------------------------------------------------------------|-----------|-----------|
| Saturated fatty acids                                                   |           |           |
| C10:0                                                                   |           | 0.46      |
| C12:0                                                                   | 1.64      | 7.93      |
| C14:0                                                                   | 18.22     | 7.85      |
| C16:0                                                                   | 23.11     | 28.45     |
| C17:0                                                                   |           | 1.05      |
| C18:0                                                                   | 2.14      | 10.49     |
| Unsaturated fatty acids                                                 |           |           |
| C15:1 $\omega$ 6 <i>c</i>                                               | 1.11      |           |
| C17:1 $\omega$ 8 <i>c</i>                                               | 2.31      | 1.35      |
| C18:1 $\omega$ 9 <i>c</i>                                               | 2.10      | 25.80     |
| summed feature 3 (16:1 $\omega$ 7 <i>c</i> /16:1 $\omega$ 6 <i>c</i> )  | 45.79     | 12.28     |
| summed feature 5 (18:2 $\omega$ 6,9 <i>c</i> /18:0 ante)                |           | 0.99      |
| summed feature 8 (18:1 $\omega$ 7 <i>c</i> , 18:1 $\omega$ 6 <i>c</i> ) | 3.58      | 3.36      |

272

273 **Supplementary References**

- 274 1. Konstantinidis KT, Tiedje JM. Genomic insights that advance the species definition for prokaryotes.  
275 *Proc Natl Acad Sci USA* 2005; **102**: 2567-2572.
- 276 2. Kim M, Oh HS, Park SC, Chun J. Towards a taxonomic coherence between average nucleotide  
277 identity and 16S rRNA gene sequence similarity for species demarcation of prokaryotes. *Int J Syst*  
278 *Evol Microbiol* 2014; **64**: 346-351.
- 279 3. Tripp HJ, Kitner JB, Schwalbach MS, Dacey JWH, Wilhelm LJ, Giovannoni SJ. SAR11 marine  
280 bacteria require exogenous reduced sulphur for growth. *Nature* 2008; **452**: 741-744.
- 281 4. Carini P, Steindler L, Beszteri S, Giovannoni SJ. Nutrient requirements for growth of the extreme  
282 oligotroph '*Candidatus Pelagibacter ubique*' HTCC1062 on a defined medium. *ISME J* 2013; **7**: 592-  
283 602.
- 284 5. Thomas PE, Ryan D, Levin W. An improved staining procedure for the detection of the peroxidase  
285 activity of cytochrome P-450 on sodium dodecyl sulfate polyacrylamide gels. *Anal Biochem* 1976; **75**:  
286 168-176.
- 287 6. Ghylin TW, Garcia SL, Moya F, Oyserman BO, Schwientek P, Forest KT *et al.* Comparative single-  
288 cell genomics reveals potential ecological niches for the freshwater acI *Actinobacteria* lineage. *ISME*  
289 *J* 2014; **8**: 2503-2516.
- 290 7. Kang I, Kim S, Islam MR, Cho J-C. The first complete genome sequences of the acI lineage, the most  
291 abundant freshwater *Actinobacteria*, obtained by whole-genome-amplification of dilution-to-  
292 extinction cultures. *Sci Rep* 2017; **7**: 42252.
- 293 8. Neuenschwander SM, Ghai R, Pernthaler J, Salcher MM. Microdiversification in genome-streamlined  
294 ubiquitous freshwater *Actinobacteria*. *ISME J* 2018; **12**: 185-198.
- 295 9. Newton RJ, Jones SE, Eiler A, McMahon KD, Bertilsson S. A guide to the natural history of  
296 freshwater lake bacteria. *Microbiol Mol Biol Rev* 2011; **75**: 14-49.
- 297 10. Parks DH, Imelfort M, Skennerton CT, Hugenholtz P, Tyson GW. CheckM: assessing the quality of  
298 microbial genomes recovered from isolates, single cells, and metagenomes. *Genome Res* 2015.
- 299 11. Fawal N, Li Q, Savelli B, Brette M, Passaia G, Fabre M *et al.* PeroxiBase: a database for large-scale  
300 evolutionary analysis of peroxidases. *Nucleic Acids Res* 2013; **41**: D441-444.

- 301 12. Edgar RC. MUSCLE: multiple sequence alignment with high accuracy and high throughput. *Nucleic*  
302 *Acids Res* 2004; **32**: 1792-1797.
- 303 13. Zamocky M, Gasselhuber B, Furtmuller PG, Obinger C. Molecular evolution of hydrogen peroxide  
304 degrading enzymes. *Arch Biochem Biophys* 2012; **525**: 131-144.
- 305 14. Buck U, Grossart H-P, Amann R, Pernthaler J. Substrate incorporation patterns of bacterioplankton  
306 populations in stratified and mixed waters of a humic lake. *Environ Microbiol* 2009; **11**: 1854-1865.
- 307 15. Garcia SL, McMahon KD, Grossart H-P, Warnecke F. Successful enrichment of the ubiquitous  
308 freshwater acI *Actinobacteria*. *Environ Microbiol Rep* 2014; **6**: 21-27.
- 309 16. Garcia SL, McMahon KD, Martinez-Garcia M, Srivastava A, Sczyrba A, Stepanauskas R *et al*.  
310 Metabolic potential of a single cell belonging to one of the most abundant lineages in freshwater  
311 bacterioplankton. *ISME J* 2013; **7**: 137-147.
- 312 17. Jezbera J, Sharma AK, Brandt U, Doolittle WF, Hahn MW. '*Candidatus* Planktophilia limnetica', an  
313 actinobacterium representing one of the most numerically important taxa in freshwater  
314 bacterioplankton. *Int J Syst Evol Microbiol* 2009; **59**: 2864-2869.
- 315 18. Kim S, Kang I, Cho JC. Genomic Analysis of a Freshwater Actinobacterium, "*Candidatus*  
316 *Limnosphaera aquatica*" Strain IMCC26207, Isolated from Lake Soyang. *J Microbiol Biotechnol*  
317 2017; **27**: 825-833.
- 318 19. Singh R, Wiseman B, Deemagarn T, Jha V, Switala J, Loewen PC. Comparative study of catalase-  
319 peroxidases (KatGs). *Arch Biochem Biophys* 2008; **471**: 207-214.
- 320 20. Gudelj M, Fruhwirth GO, Paar A, Lottspeich F, Robra KH, Cavaco-Paulo A *et al*. A catalase-  
321 peroxidase from a newly isolated thermoalkaliphilic *Bacillus* sp with potential for the treatment of  
322 textile bleaching effluents. *Extremophiles* 2001; **5**: 423-429.
- 323 21. Claiborne A, Fridovich I. Purification of the o-dianisidine peroxidase from *Escherichia coli* B.  
324 Physicochemical characterization and analysis of its dual catalatic and peroxidatic activities. *J Biol*  
325 *Chem* 1979; **254**: 4245-4252.
- 326 22. Varnado CL, Hertwig KM, Thomas R, Roberts JK, Goodwin DC. Properties of a novel periplasmic  
327 catalase-peroxidase from *Escherichia coli* O157 : H7. *Arch Biochem Biophys* 2004; **421**: 166-174.

- 328 23. Kobayashi C, Suga Y, Yamamoto K, Yomo T, Ogasahara K, Yutani K *et al.* Thermal conversion from  
329 low- to high-activity forms of catalase I from *Bacillus stearothermophilus*. *J Biol Chem* 1997; **272**:  
330 23011-23016.
- 331 24. Brownpeterson NJ, Salin ML. Purification of a catalase-peroxidase from *Halobacterium-Halobium* -  
332 characterization of some unique properties of the halophilic enzyme. *J Bacteriol* 1993; **175**: 4197-  
333 4202.
- 334 25. Marcinkeviciene JA, Magliozzo RS, Blanchard JS. Purification and characterization of the  
335 *Mycobacterium-Smegmatis* catalase-peroxidase involved in isoniazid activation. *J Biol Chem* 1995;  
336 **270**: 22290-22295.
- 337 26. Johnsson K, Froland WA, Schultz PG. Overexpression, purification, and characterization of the  
338 catalase-peroxidase KatG from *Mycobacterium tuberculosis*. *J Biol Chem* 1997; **272**: 2834-2840.
- 339 27. Hochman A, Shemesh A. Purification and characterization of a catalase-peroxidase from the  
340 photosynthetic bacterium *Rhodospseudomonas capsulata*. *J Biol Chem* 1987; **262**: 6871-6876.
- 341 28. Engleder M, Regelsberger G, Jakopitsch C, Furtmuller PG, Ruker F, Peschek GA *et al.* Nucleotide  
342 sequence analysis, overexpression in *Escherichia coli* and kinetic characterization of *Anacystis*  
343 *nidulans* catalase-peroxidase. *Biochimie* 2000; **82**: 211-219.
- 344 29. Obinger C, Regelsberger G, Strasser G, Burner U, Peschek GA. Purification and characterization of a  
345 homodimeric catalase-peroxidase from the cyanobacterium *Anacystis nidulans*. *Biochem Biophys Res*  
346 *Commun* 1997; **235**: 545-552.
- 347 30. Mutsuda M, Ishikawa T, Takeda T, Shigeoka S. The catalase-peroxidase of *Synechococcus* PCC  
348 7942: Purification, nucleotide sequence analysis and expression in *Escherichia coli*. *Biochem J* 1996;  
349 **316**: 251-257.
- 350 31. Jakopitsch C, Ruker F, Regelsberger G, Dockal M, Peschek GA, Obinger C. Catalase-peroxidase  
351 from the cyanobacterium *Synechocystis* PCC 6803: Cloning, overexpression in *Escherichia coli*, and  
352 kinetic characterization. *Biol Chem* 1999; **380**: 1087-1096.
- 353 32. Wang HX, Tokusige Y, Shinoyama H, Fujii T, Urakami T. Purification and characterization of a  
354 thermostable catalase from culture broth of *Thermoascus aurantiacus*. *J Ferment Bioeng* 1998; **85**:  
355 169-173.

- 356 33. Thompson VS, Schaller KD, Apel WA. Purification and characterization of a novel thermo-alkali-  
357 stable catalase from *Thermus brockianus*. *Biotechnol Prog* 2003; **19**: 1292-1299.
